# Supplementary material for: Preparation and evaluation of a layered double hydroxide film on a nanoporous anodic aluminum oxide/aluminum wire as a highly thermal-resistant solid-phase microextraction fiber
Source: Royal Society of Chemistry journal article supplement (doi:10.1039/c4nj01998a), 2015-01-01
Supplement: c4nj01998a1.pdf [file c4nj01998a1.pdf]

## **New Journal of Chemistry**

### **Preparation and evaluation of layered double hydroxide film on nanoporous anodic aluminum oxide/aluminum wire as a highly thermal-resistant solid-phase microextraction fiber**

Mir Mahdi Abolghasemi <sup>a,\*</sup>, Vahid Yousefi <sup>a</sup>, Ahmad Amirshaghghi <sup>b</sup>

<sup>a</sup> Department of Chemistry, Faculty of Science, University of Maragheh, Maragheh, Iran

<sup>b</sup> Department of Bioengineering, School of Engineering and Applied Sciences, University of Pennsylvania, Philadelphia, Pennsylvania  
19104, United States.

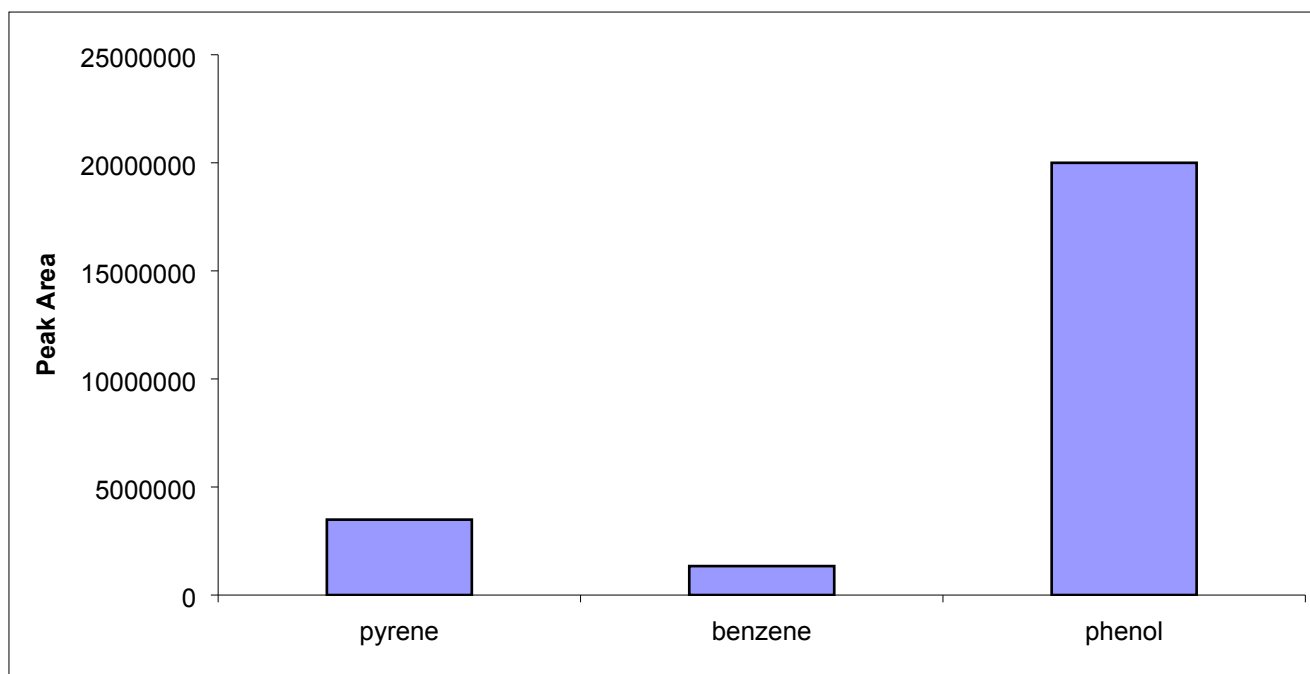

Fig. S1. Comparison between phenol, benzene and pyrene as selected compounds of phenolic compounds, BTEX and polycyclic aromatic compounds respectively
